# Supplementary material for: Coumarin derivatives as dual photo/thermal initiators for free radical polymerization and 3D printing
Source: Royal Society of Chemistry journal article supplement (doi:10.1039/d4py00485j), 2024-01-01

## Supporting Information

### Coumarin Derivatives as Dual Photo/Thermal initiators for Free Radical Polymerization and 3D Printing

Tong Gao <sup>a,b</sup>, Fabrice Morlet-Savary <sup>a,b</sup>, Bernadette Graff <sup>a,b</sup>, Frédéric Dumur <sup>c</sup>, Jing  
Zhang <sup>d</sup>, Pu Xiao <sup>e,\*</sup> and Jacques Lalevée <sup>a,b\*</sup>

<sup>a</sup> Université de Haute-Alsace, CNRS, IS2M UMR7361, F-68100 Mulhouse, France.

<sup>b</sup> Université de Strasbourg, France.

<sup>c</sup> Aix Marseille Univ, CNRS, ICR, UMR 7273, F-13397 Marseille, France.

<sup>d</sup> Future Industries Institute, University of South Australia, Mawson Lakes, SA 5095,  
Australia.

<sup>e</sup> State Key Laboratory of High Performance Ceramics and Superfine Microstructure,  
Shanghai Institute of Ceramics, Chinese Academy of Sciences, Shanghai 200050, P.  
R. China.

E-mail address: [jacques.lalevee@uha.fr](mailto:jacques.lalevee@uha.fr) (JL); [p.xiao@mail.sic.ac.cn](mailto:p.xiao@mail.sic.ac.cn) (PX)

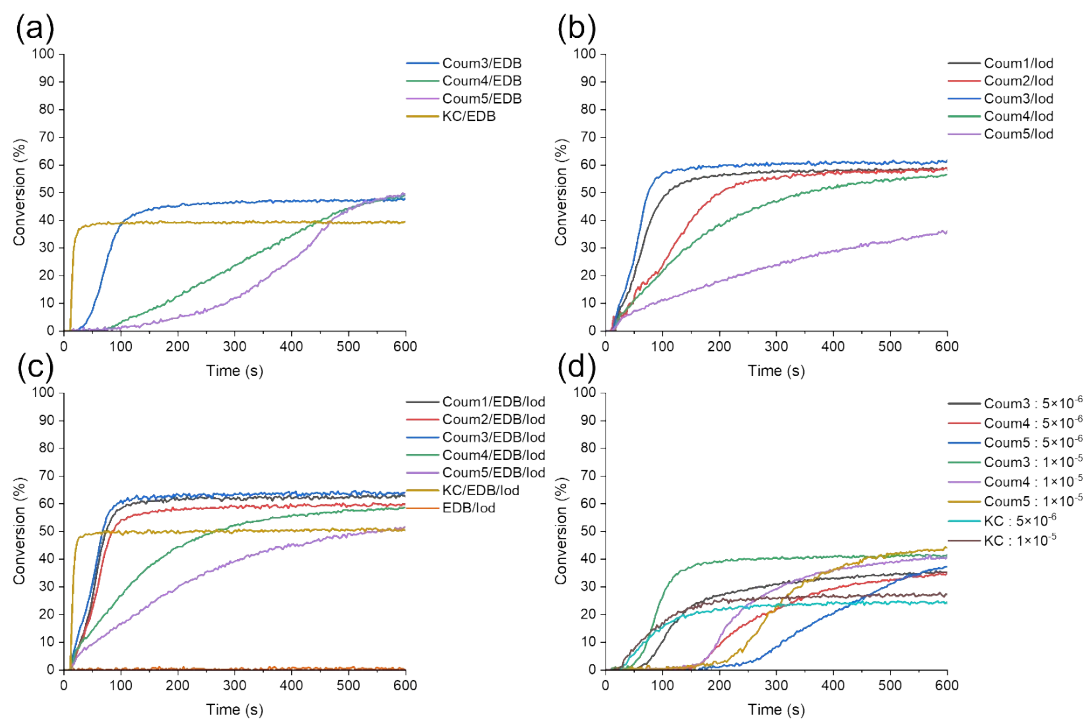

**Figure S1.** (a), (b), and (c) Photopolymerization kinetics of TMPTA in two- (PIs/EDB, PIs/Iod) and three-component (PIs/EDB/Iod) PISs containing  $1 \times 10^{-6} \text{ mol} \cdot \text{g}^{-1}$  in TMPTA of PIs in a plastic mold (thickness = 1.4 mm) irradiated using a 405 nm LED under air conditions; (d) Photopolymerization kinetics of TMPTA in single-component (PIs) PISs containing different molar content of PIs in a plastic mold (thickness = 1.4 mm) irradiated by a 405 nm LED under air conditions. EDB and Iod ( $1 \times 10^{-5} \text{ mol} \cdot \text{g}^{-1}$  in TMPTA). The irradiation starts at  $t = 10 \text{ s}$ .

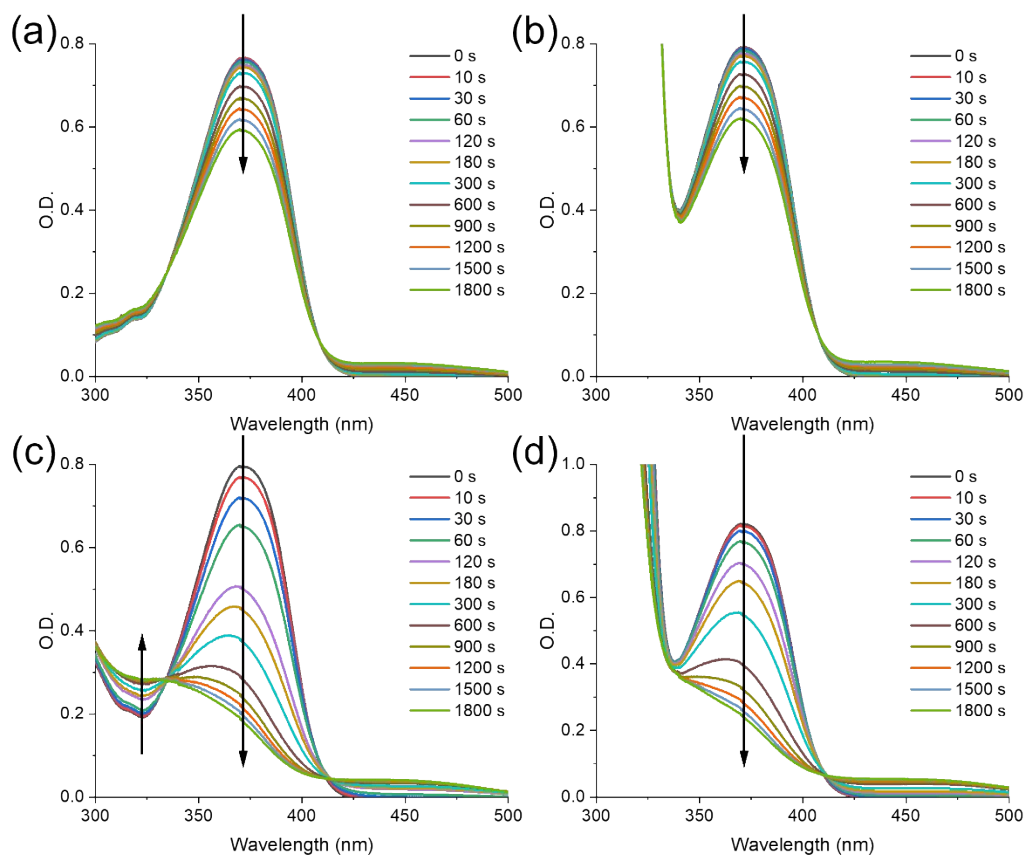

**Figure S2.** Steady state photolysis of (a) Coum2, (b) Coum2/EDB, (c) Coum2/Iod, and (d) Coum2/EDB/Iod in acetonitrile when exposed to 405 nm LED.

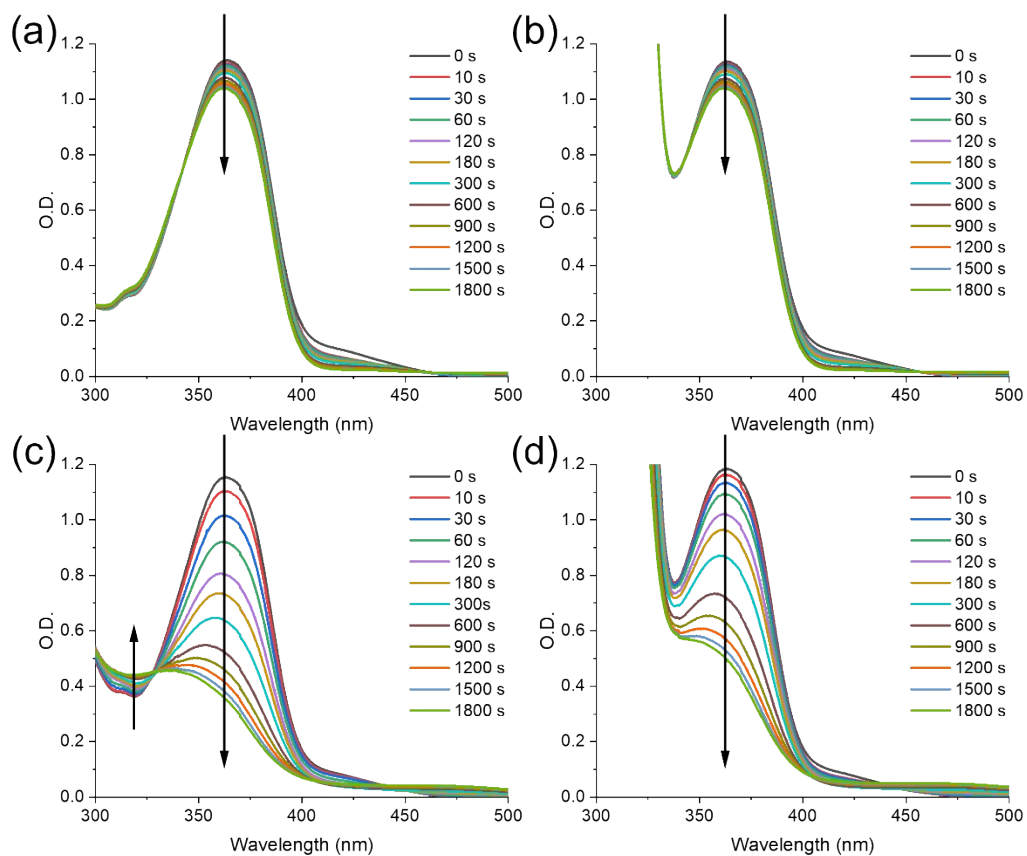

**Figure S3.** Steady state photolysis of (a) Coum3, (b) Coum3/EDB, (c) Coum3/Iod, and (d) Coum3/EDB/Iod in acetonitrile when exposed to 405 nm LED.

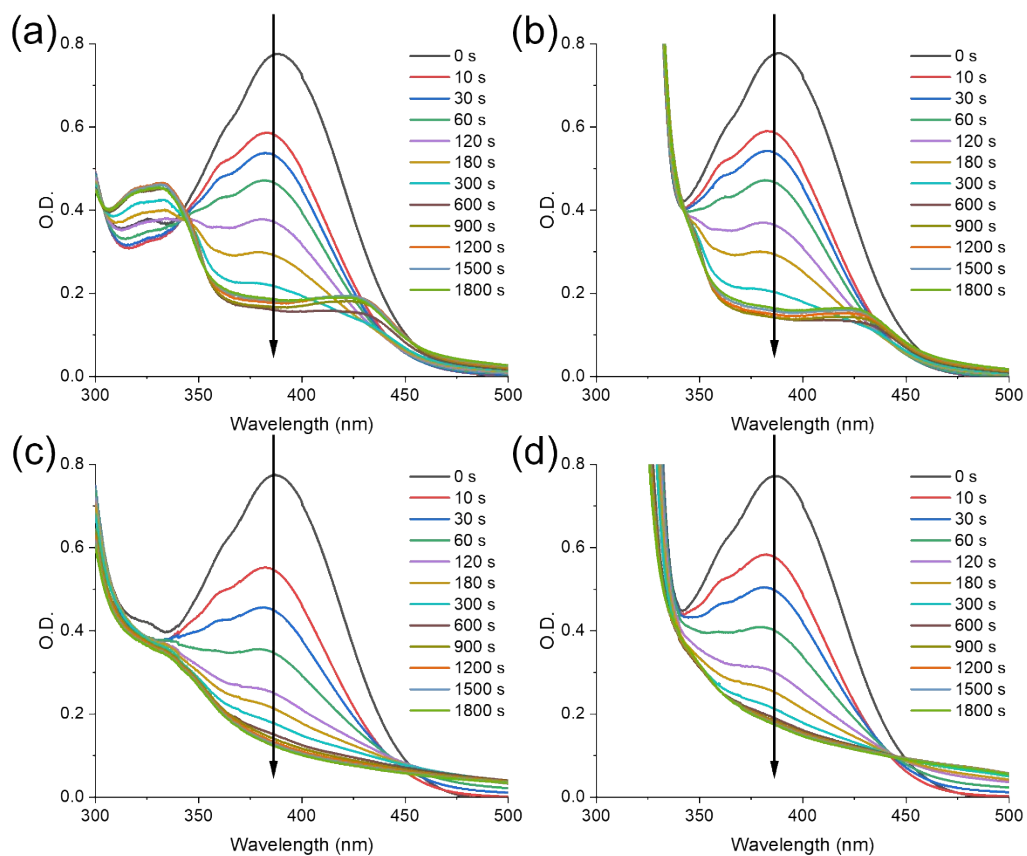

**Figure S4.** Steady state photolysis of (a) Coum4, (b) Coum4/EDB, (c) Coum4/Iod, and (d) Coum4/EDB/Iod in acetonitrile when exposed to 405 nm LED.

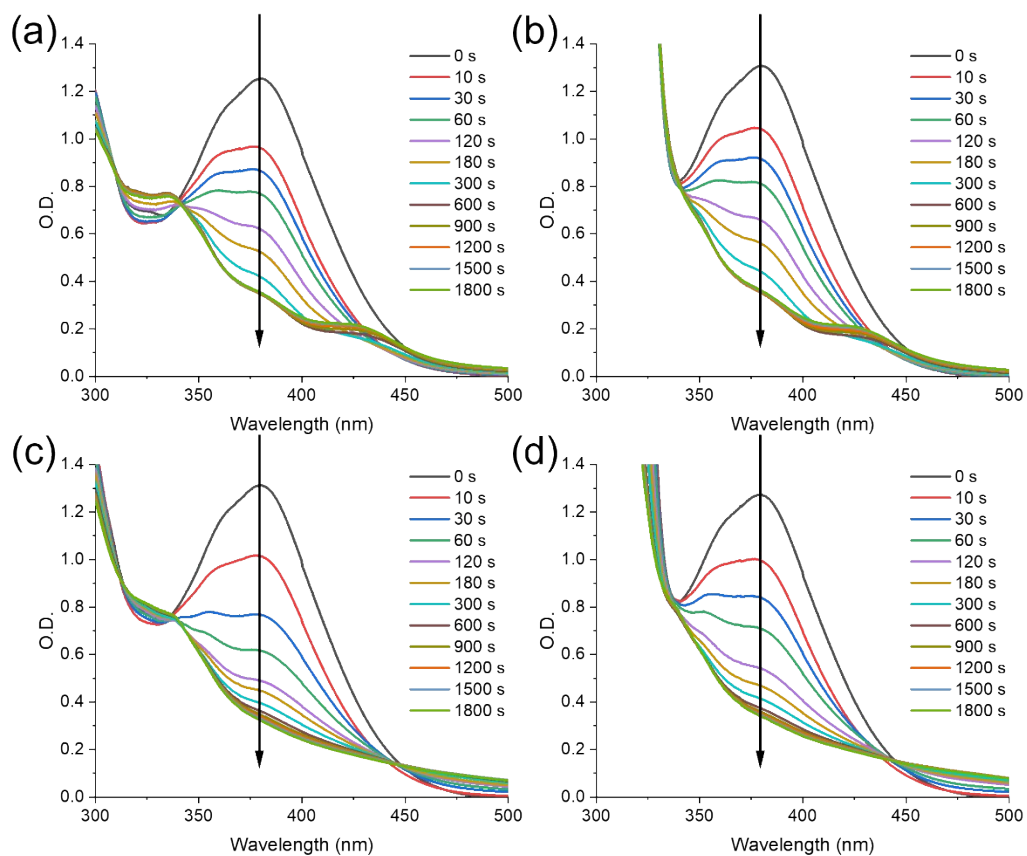

**Figure S5.** Steady state photolysis of (a) Coum5, (b) Coum5/EDB, (c) Coum5/Iod, and (d) Coum5/EDB/Iod in acetonitrile when exposed to 405 nm LED.

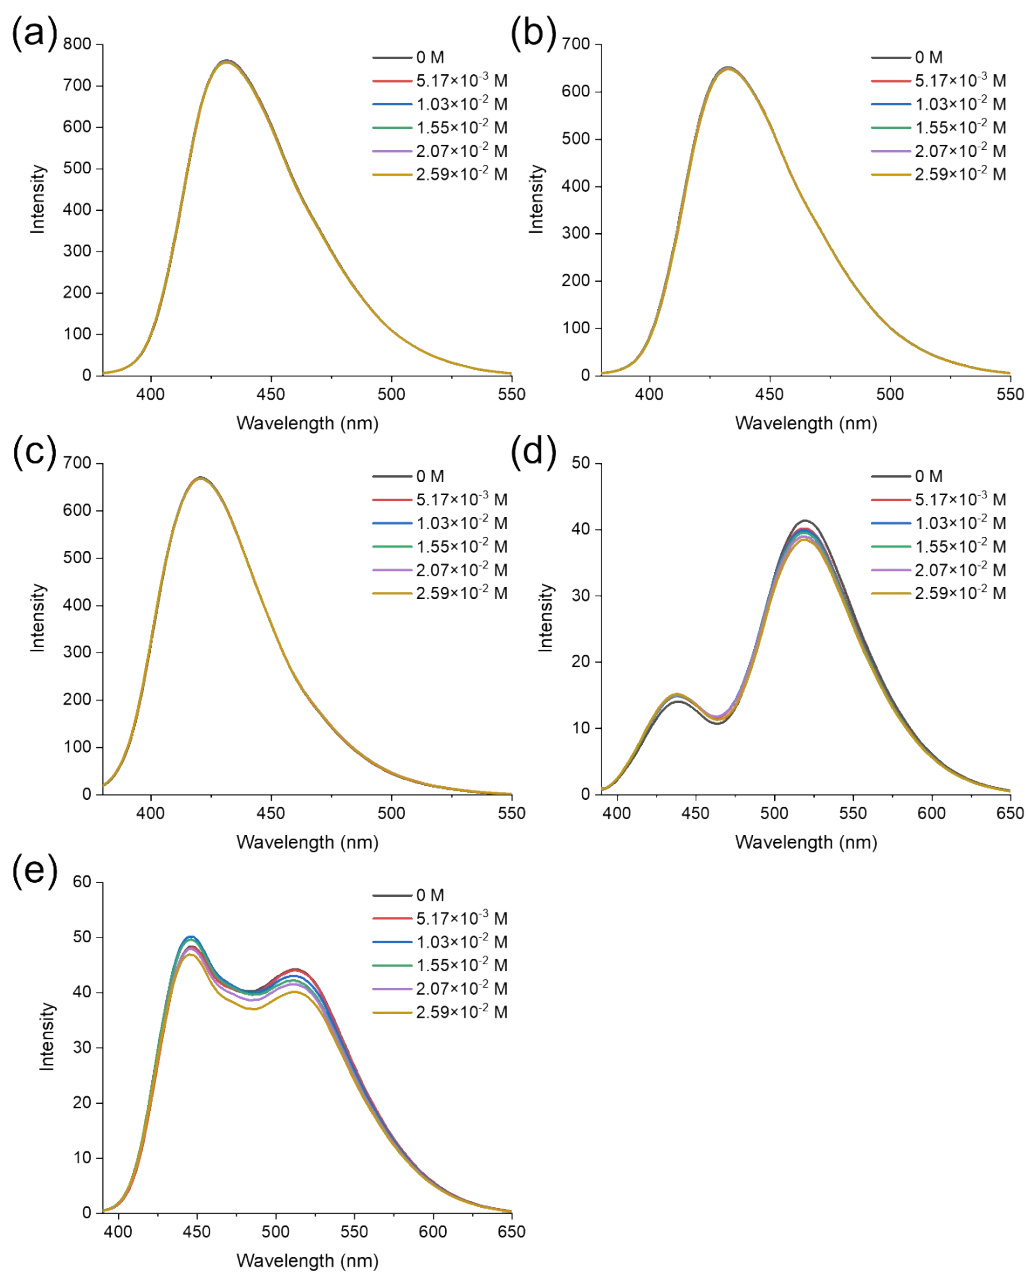

**Figure S6.** Fluorescence quenching of (a) Coum1, (b) Coum2, (c) Coum3, (d) Coum4, and (e) Coum5 by EDB in acetonitrile.

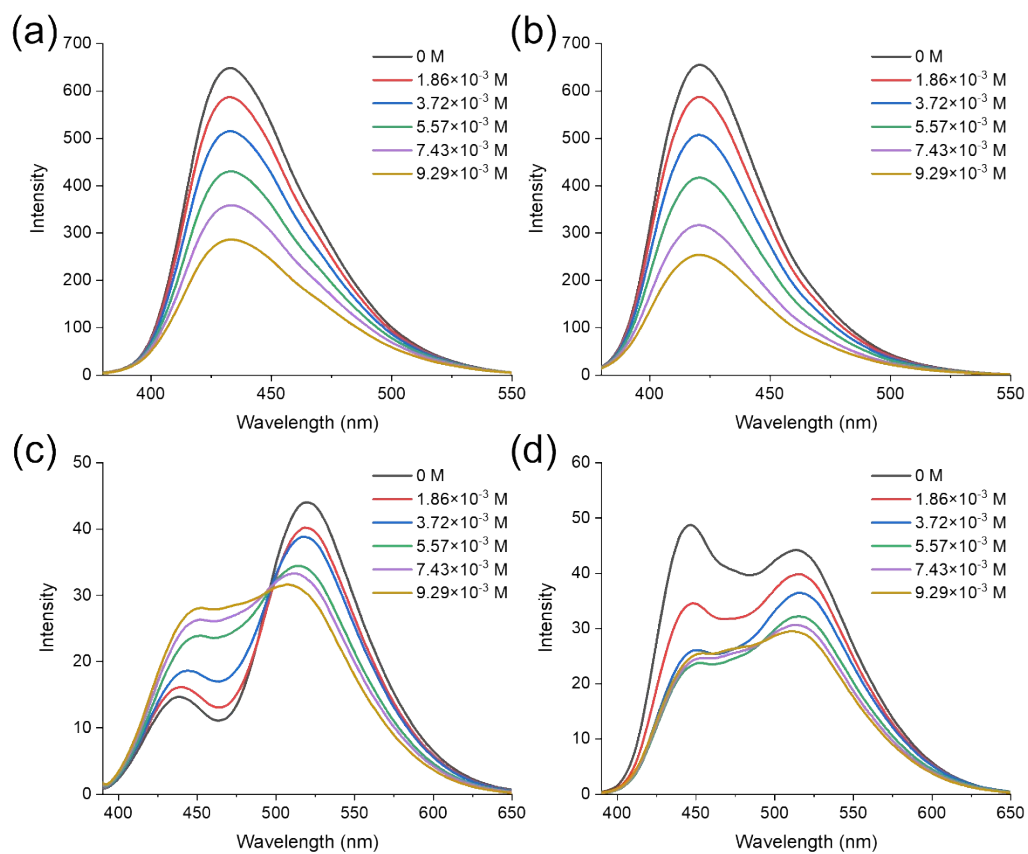

**Figure S7.** Fluorescence quenching of (a) Coum2, (b) Coum3, (c) Coum4, and (d) Coum5 by Iod in acetonitrile.



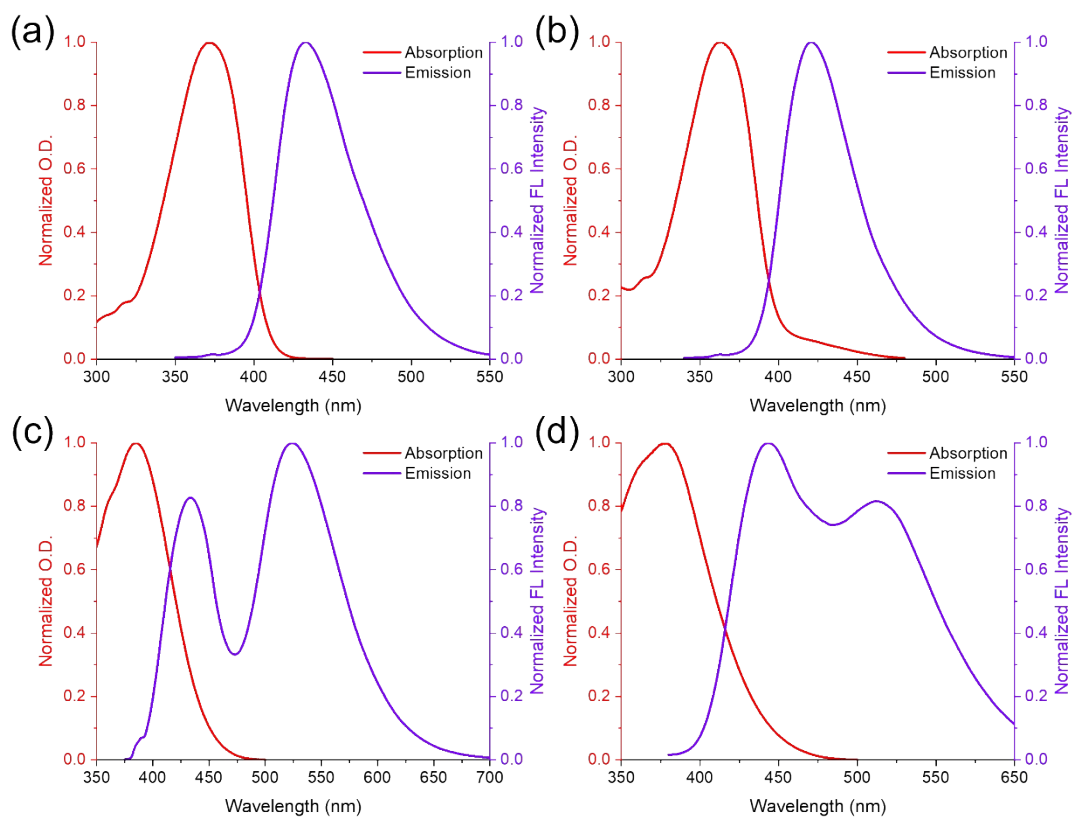

**Figure S8.** Singlet-state energy determination of (a) Coum2, (b) Coum3, (c) Coum4, and (d) Coum5 in acetonitrile (concentration =  $5 \times 10^{-5}$  M).

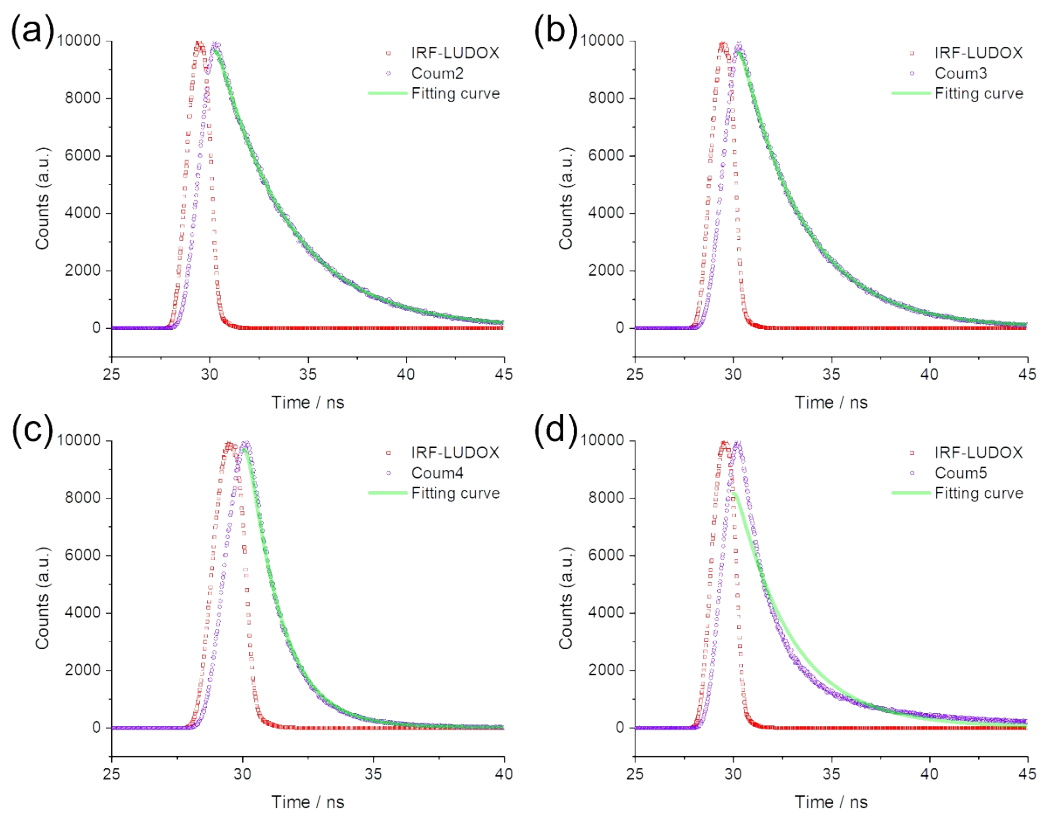

**Figure S9.** Fluorescence decay curve of (a) Coum2, (b) Coum3, (c) Coum4, and (d) Coum5 in acetonitrile (concentration =  $5 \times 10^{-5}$  M).

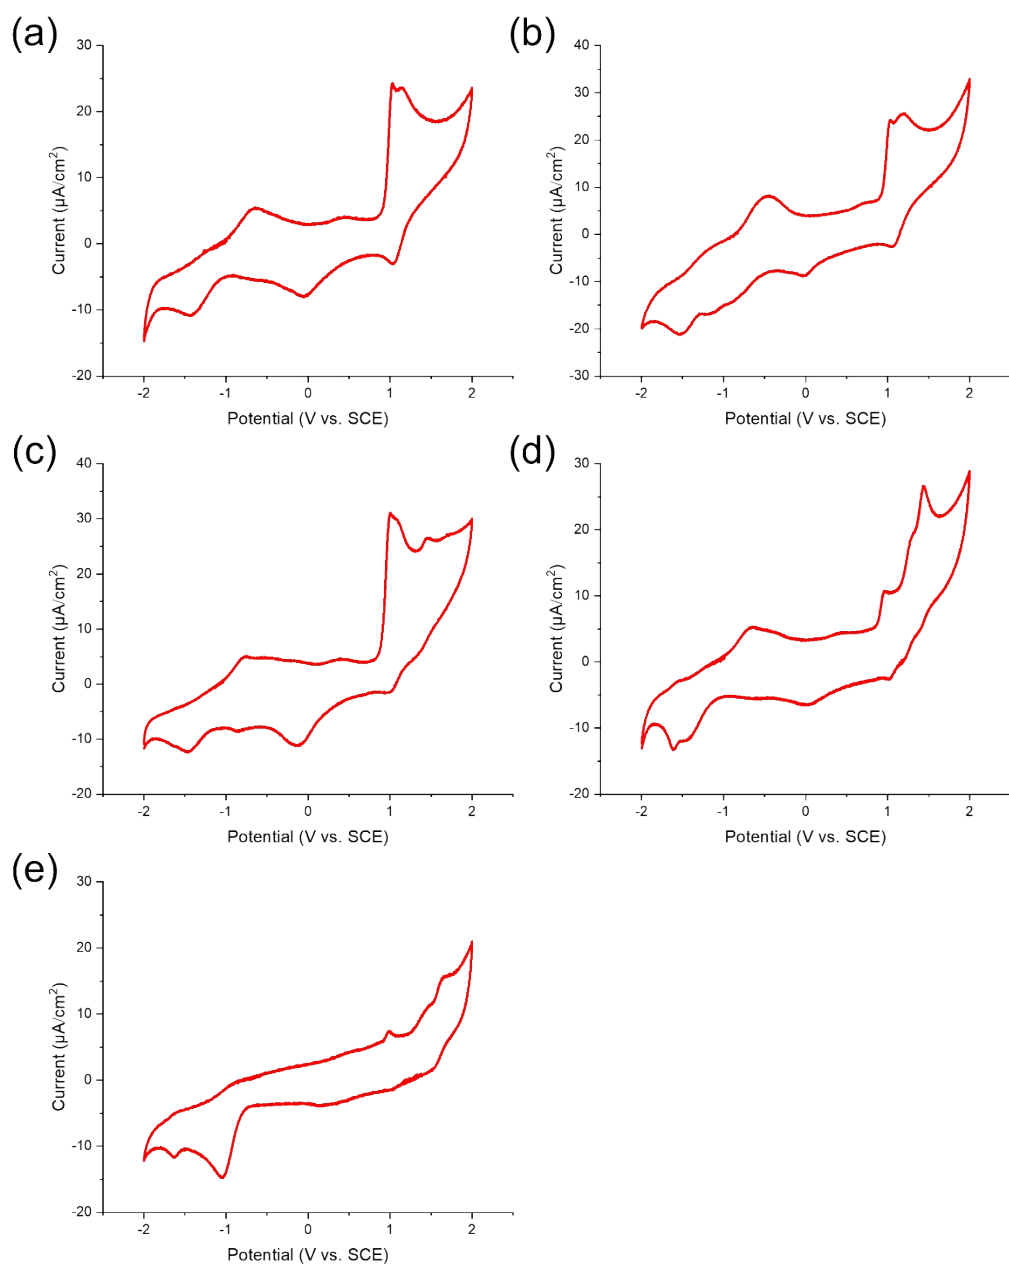

**Figure S10.** Cyclic voltammograms of electrochemical reactions of (a) Coum1, (b) Coum2, (c) Coum3, (d) Coum4, and (e) Coum5 in acetonitrile solvent against saturated calomel electrode (SCE) under nitrogen saturated solution.

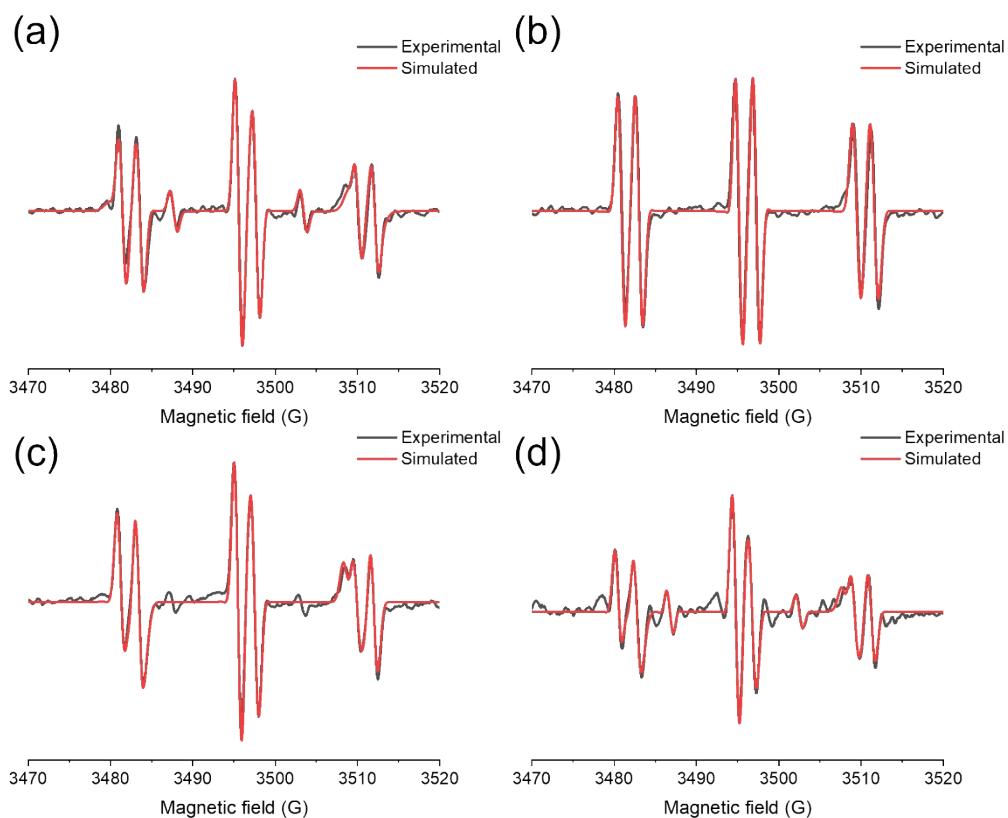

**Figure S11.** ESR-ST spectra of the radical adducts of (a) Coum2/Iod, (b) Coum3/Iod, (c) Coum4/Iod, and (d) Coum5/Iod in  $N_2$  saturated medium when exposed to the 405 nm LED, with PBN acting as the trapping agent in *tert*-butylbenzene.

**Table S1.** FCs of TMPTA in two- (PIs/EDB, PIs/Iod) and three-component (PIs/EDB/Iod) PISs containing  $1 \times 10^{-6} \text{ mol} \cdot \text{g}^{-1}$  TMPTA of PIs after 600 s of irradiation by a 405 nm LED under air conditions (for EDB and Iod; the concentration is  $1 \times 10^{-5} \text{ mol} \cdot \text{g}^{-1}$  in TMPTA).

| PIs/EDB   | FC (%) | PIs/Iod   | FC (%) | PIs/EDB/Iod   | FC (%) |
|-----------|--------|-----------|--------|---------------|--------|
| Coum1/EDB | np     | Coum1/Iod | 59     | Coum1/EDB/Iod | 63     |
| Coum2/EDB | np     | Coum2/Iod | 59     | Coum2/EDB/Iod | 60     |
| Coum3/EDB | 42     | Coum3/Iod | 62     | Coum3/EDB/Iod | 64     |
| Coum4/EDB | 41     | Coum4/Iod | 57     | Coum4/EDB/Iod | 59     |
| Coum5/EDB | 44     | Coum5/Iod | 36     | Coum5/EDB/Iod | 52     |
| KC/EDB    | 39     | KC/Iod    | np     | KC/EDB/Iod    | 50     |
|           |        |           |        | EDB/Iod       | np     |

np: no polymerization.

**Table S2.** FCs of TMPTA in single-component PIs PISs containing different molar contents of PIs after 600s of irradiation by a 405 nm LED under air conditions.

| PIs | FC | PIs | FC | PIs | FC | PIs | FC |
|-----|----|-----|----|-----|----|-----|----|
|-----|----|-----|----|-----|----|-----|----|

| $1 \times 10^{-6} \text{ mol} \cdot \text{g}^{-1}$ | (%) | $2.5 \times 10^{-6} \text{ mol} \cdot \text{g}^{-1}$ | (%) | $5 \times 10^{-6} \text{ mol} \cdot \text{g}^{-1}$ | (%) | $5 \times 10^{-6} \text{ mol} \cdot \text{g}^{-1}$ | (%) |
|----------------------------------------------------|-----|------------------------------------------------------|-----|----------------------------------------------------|-----|----------------------------------------------------|-----|
| Coum1                                              | np  | Coum1                                                | np  | Coum1                                              | np  | Coum1                                              | np  |
| Coum2                                              | np  | Coum2                                                | np  | Coum2                                              | np  | Coum2                                              | np  |
| Coum3                                              | np  | Coum3                                                | np  | Coum3                                              | 35  | Coum3                                              | 42  |
| Coum4                                              | np  | Coum4                                                | np  | Coum4                                              | 35  | Coum4                                              | 41  |
| Coum5                                              | np  | Coum5                                                | np  | Coum5                                              | 37  | Coum5                                              | 44  |
| KC                                                 | np  | KC                                                   | np  | KC                                                 | 25  | KC                                                 | 27  |

np: no polymerization.

**Table S3.** Hyperfine coupling constants (hfcs) for the detected spin adduct of PBN in *tert*-butylbenzene of Coums in  $\text{N}_2$  saturated medium under the irradiation of 405 nm LED.

| Coums | Radical 1                              | Radical 2                             | PBNox  |
|-------|----------------------------------------|---------------------------------------|--------|
| Coum1 | aN = 14.3 G ; aH = 2.1 G ;<br>(100.0%) |                                       |        |
| Coum2 | aN = 14.2 G ; aH = 2.1 G ;<br>(64.2%)  | aN = 14.8 G ; aH = 2.0 G ;<br>(26.6%) | (9.2%) |
| Coum3 | aN = 14.3 G ; aH = 2.1 G ;<br>(100.0%) |                                       |        |
| Coum4 | aN = 14.3 G ; aH = 2.1 G ;<br>(61.0%)  | aN = 13.8 G ; aH = 1.8 G ;<br>(39.0%) |        |
| Coum5 | aN = 14.3 G ; aH = 2.1 G ;<br>(53.2%)  | aN = 13.3 G ; aH = 1.6 G ;<br>(40.2%) | (6.6%) |

### **General informations**

All reagents and solvents were purchased from Aldrich or Alfa Aesar and used as received without further purification. Mass spectroscopy was performed by the Spectropole of Aix-Marseille University.  $^1\text{H}$  and  $^{13}\text{C}$  NMR spectra were determined at room temperature in 5 mm o.d. tubes on a Bruker Avance 400 or a Bruker Avance 300 spectrometer of the Spectropole:  $^1\text{H}$  (400 MHz),  $^1\text{H}$  (300 MHz),  $^{13}\text{C}$  (100 MHz), and  $^{13}\text{C}$  (75 MHz). All  $^1\text{H}$  chemical shifts were referenced to the solvent peak  $\text{CDCl}_3$  (7.26 ppm),  $\text{DMSO-d}_6$  (2.49 ppm) and the  $^{13}\text{C}$  chemical shifts were referenced to the solvent peak  $\text{CDCl}_3$  (77.0 ppm).

## Synthesis of ethyl 2-(7-(dimethylamino)-2-oxo-2H-chromen-4-yl)acetate (Coum1)

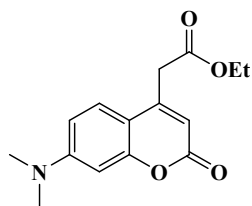

Chemical Formula: C<sub>15</sub>H<sub>17</sub>NO<sub>4</sub>

Molecular Weight: 275.3040

3-Dimethylaminophenol (12 g, 87.5 mmol, M = 137.18 g/mol), diethyl 1,3-acetonedicarboxylate (19.46 g, 17.5 mL, 96.2 mmol, 1.1 eq., M = 202.20 g/mol, d = 1.113) and ZnCl<sub>2</sub> (14.31 g, 105 mmol, M = 136.30 g/mol) were dissolved in absolute ethanol (50 mL). The reaction mixture was heated at reflux for 15 h. The reaction mixture was cooled to room temperature and the yellow precipitate formed was filtered. The filtrate was poured into ice-water. The precipitate formed was filtered and air-dried. The product was recrystallized to give ethyl 7-dimethylaminocoumarin as orange needles (14.69 g, 61% yield).

<sup>1</sup>H NMR (300 MHz, CDCl<sub>3</sub>) δ 7.40 (d, *J* = 8.9 Hz, 1H), 6.62 (dd, *J* = 9.0, 2.5 Hz, 1H), 6.52 (d, *J* = 2.5 Hz, 1H), 6.06 (s, 1H), 4.18 (q, *J* = 7.1 Hz, 2H), 3.67 (s, 2H), 3.05 (s, 6H), 1.25 (t, *J* = 7.1 Hz, 3H).

<sup>13</sup>C NMR (75 MHz, CDCl<sub>3</sub>) δ 169.09, 161.72, 155.96, 152.96, 148.42, 125.28, 110.75, 108.98, 108.51, 98.36, 61.57, 40.09, 38.26, 14.09.

<sup>1</sup>H NMR spectrum of ethyl 2-(7-(dimethylamino)-2-oxo-2H-chromen-4-yl)acetate

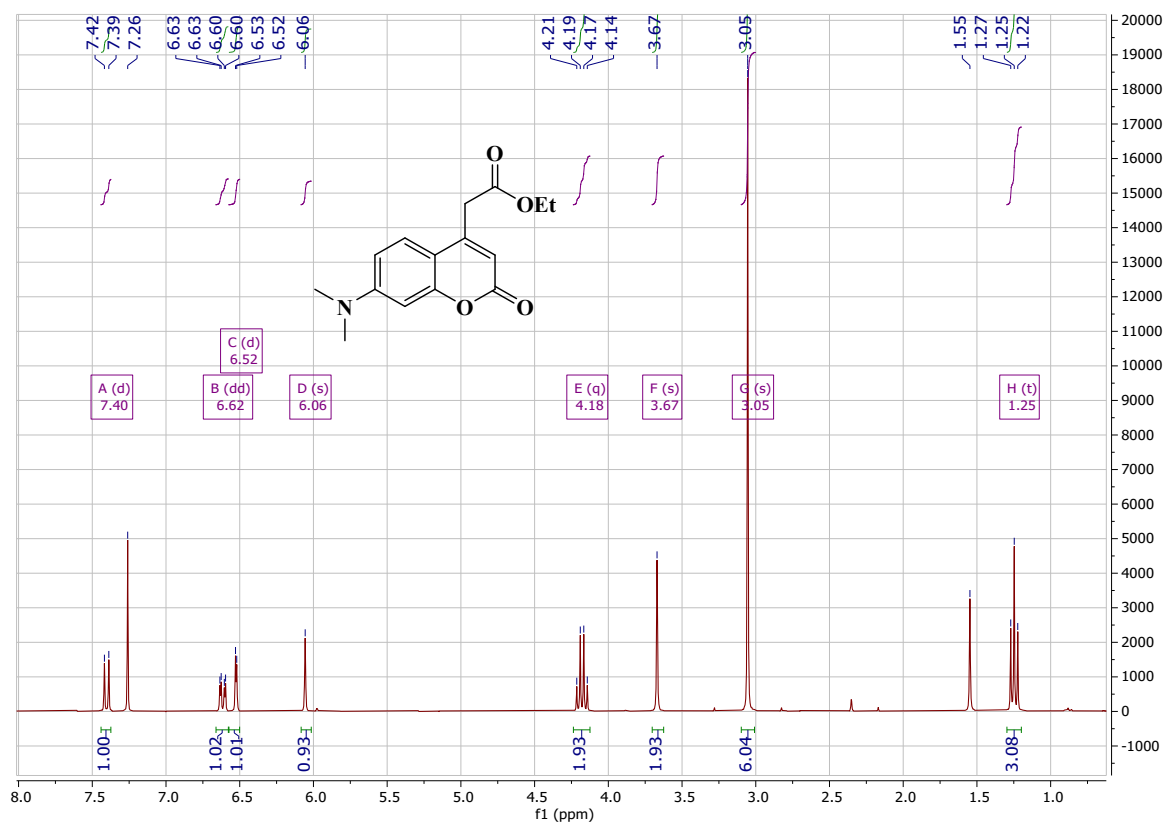

<sup>13</sup>C NMR spectrum of ethyl 2-(7-(dimethylamino)-2-oxo-2H-chromen-4-yl)acetate

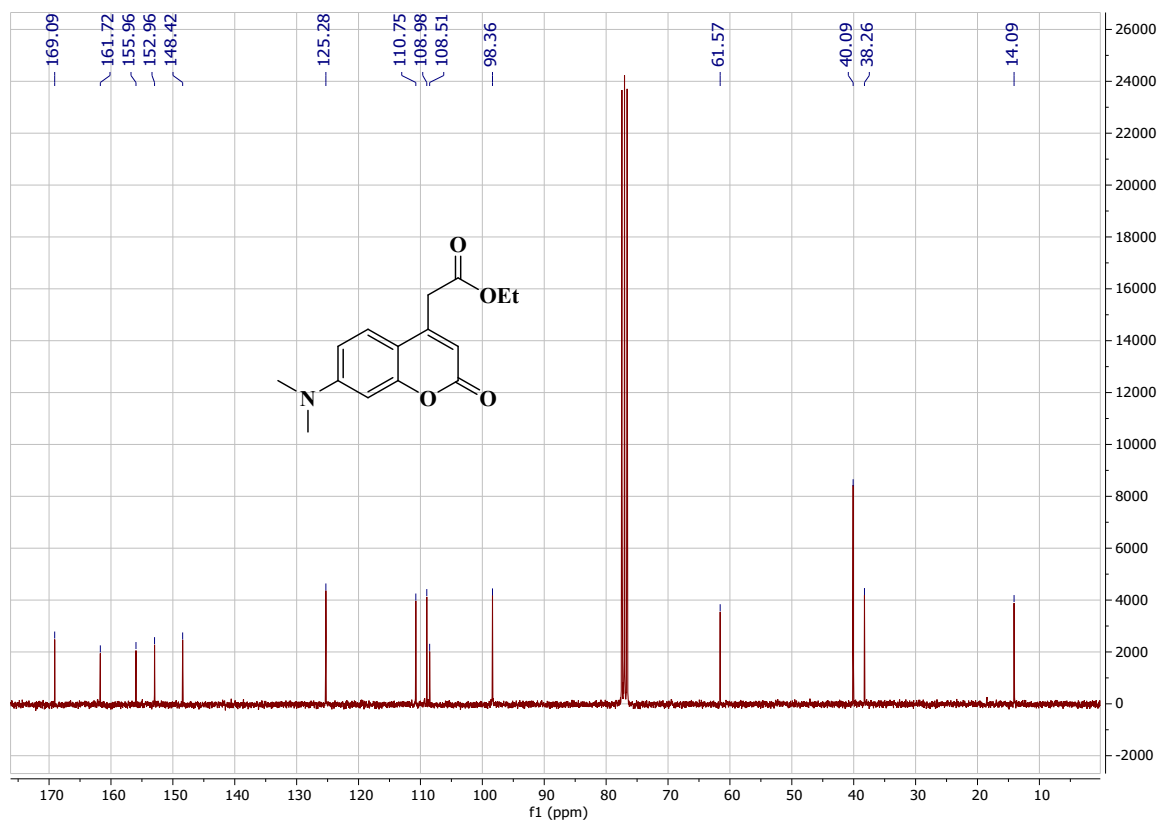



## Synthesis of 2-(7-(dimethylamino)-2-oxo-2H-chromen-4-yl)acetic acid (Coum2)

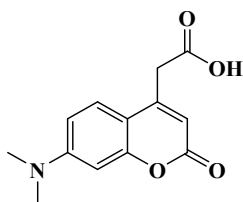

Chemical Formula: C<sub>13</sub>H<sub>13</sub>NO<sub>4</sub>

Molecular Weight: 247.2500

Ethyl 2-(7-(dimethylamino)-2-oxo-2H-chromen-4-yl)acetate (10 g, 36.32 mmol, M = 275.30 g/mol) was dissolved in THF/H<sub>2</sub>O (3:1) (60 mL). 2M LiOH solution (36.3 mL, 72.64 mmol, 2.0 equiv., 1.74 g, in 35 mL) was added dropwise. The reaction mixture was stirred at room temperature for 30 min. Water (60 mL) was added, the aqueous layer was extracted with Et<sub>2</sub>O several times. The aqueous layer was acidified to pH = 2 by a 2 M HCl solution. The precipitate formed was filtered and dried under vacuum to give the acid as a yellow solid (7.27 g, 81% yield).

<sup>1</sup>H NMR (300 MHz, DMSO) δ 12.71 (s, 1H), 7.47 (d, *J* = 9.0 Hz, 1H), 6.73 (dd, *J* = 9.0, 2.5 Hz, 1H), 6.56 (d, *J* = 2.5 Hz, 1H), 6.04 (s, 1H), 3.78 (s, 2H), 3.02 (s, 6H).

<sup>13</sup>C NMR (75 MHz, DMSO) δ 170.76, 160.66, 155.41, 152.82, 150.20, 125.98, 109.60, 109.12, 108.10, 97.46, 39.71, 37.25.

### $^1\text{H}$ NMR spectrum of 2-(7-(dimethylamino)-2-oxo-2H-chromen-4-yl)acetic acid

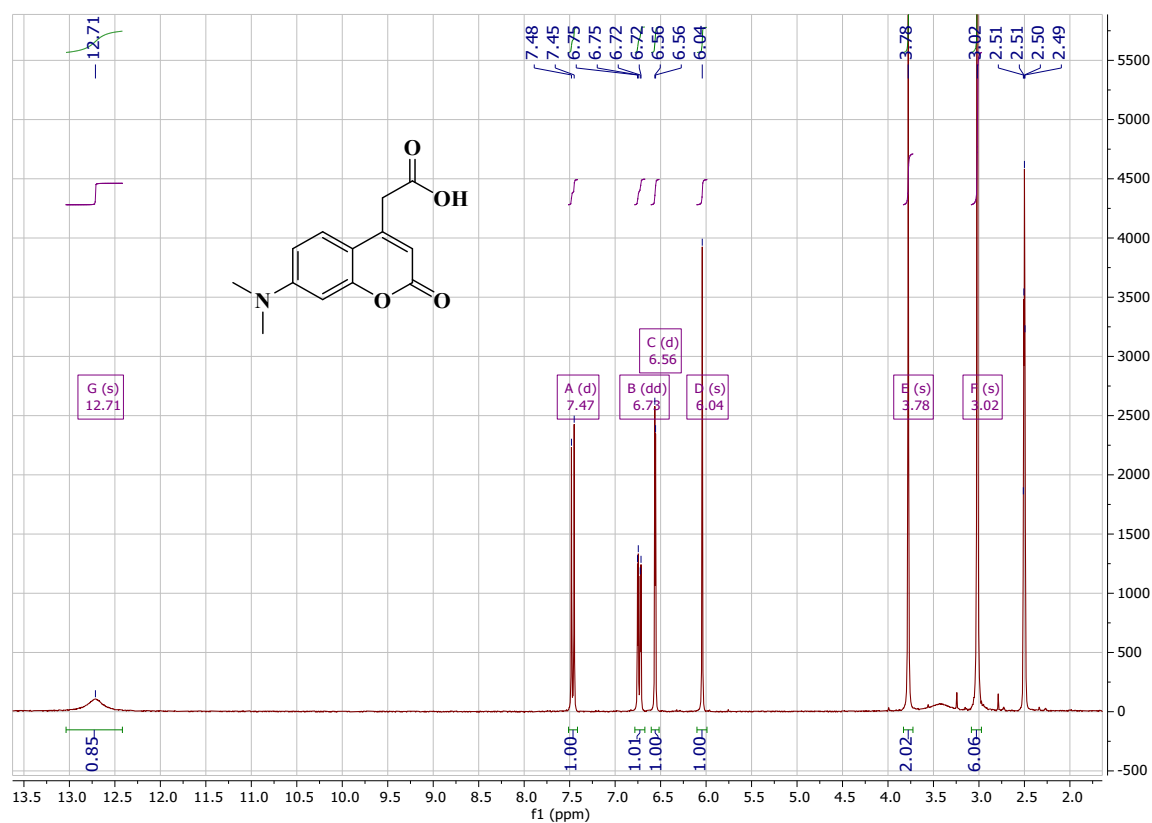

### $^{13}\text{C}$ NMR spectrum of 2-(7-(dimethylamino)-2-oxo-2H-chromen-4-yl)acetic acid

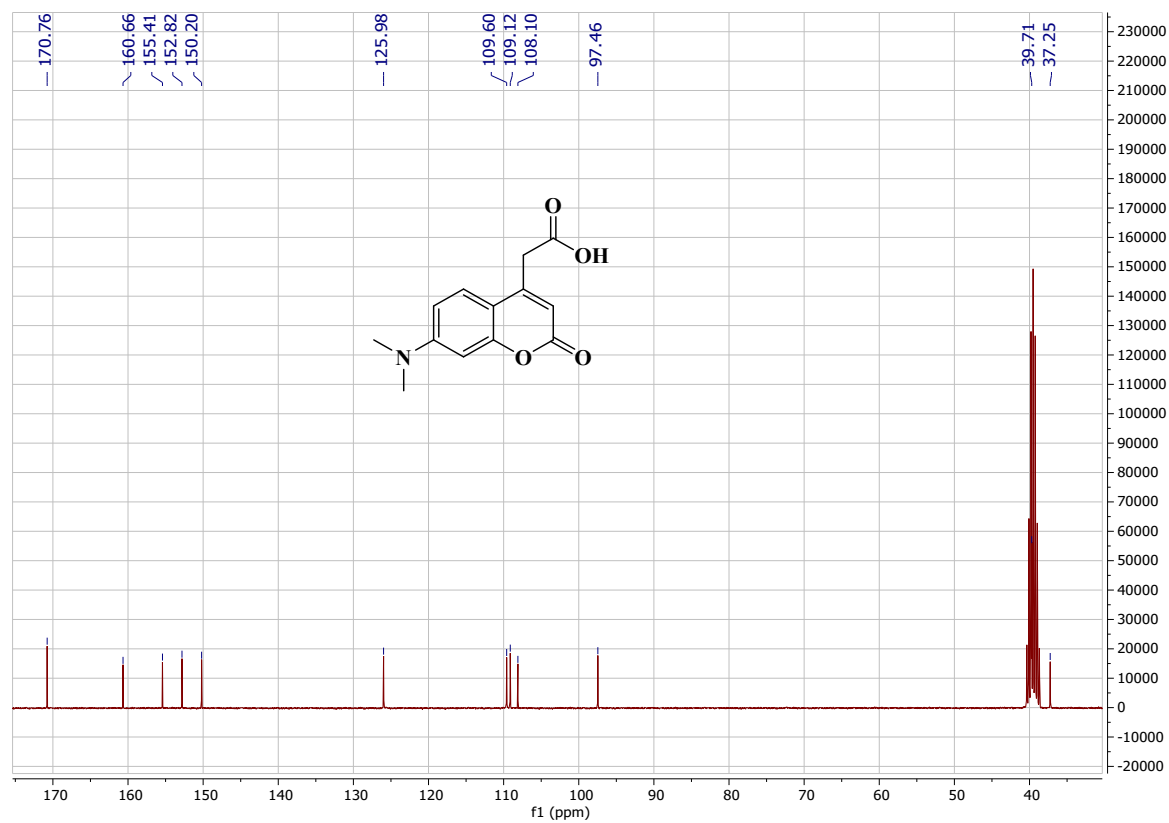

Synthesis of 7-(dimethylamino)-4-methyl-2*H*-chromen-2-one (Coum3)

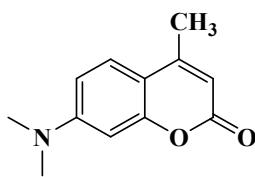

Chemical Formula: C<sub>12</sub>H<sub>13</sub>NO<sub>2</sub>

Molecular Weight: 203.2410

<sup>1</sup>H NMR (300 MHz, CDCl<sub>3</sub>) δ 7.40 (d, *J* = 8.9 Hz, 1H), 6.62 (dd, *J* = 8.8, 2.4 Hz, 1H), 6.52 (d, *J* = 2.4 Hz, 1H), 5.98 (s, 1H), 3.05 (s, 6H), 2.35 (s, 3H).

<sup>13</sup>C NMR (75 MHz, CDCl<sub>3</sub>) δ 162.09, 155.68, 152.86, 125.26, 109.64, 109.32, 108.76, 98.26, 40.13, 18.46.

<sup>1</sup>H NMR spectrum of 7-(dimethylamino)-4-methyl-2H-chromen-2-one

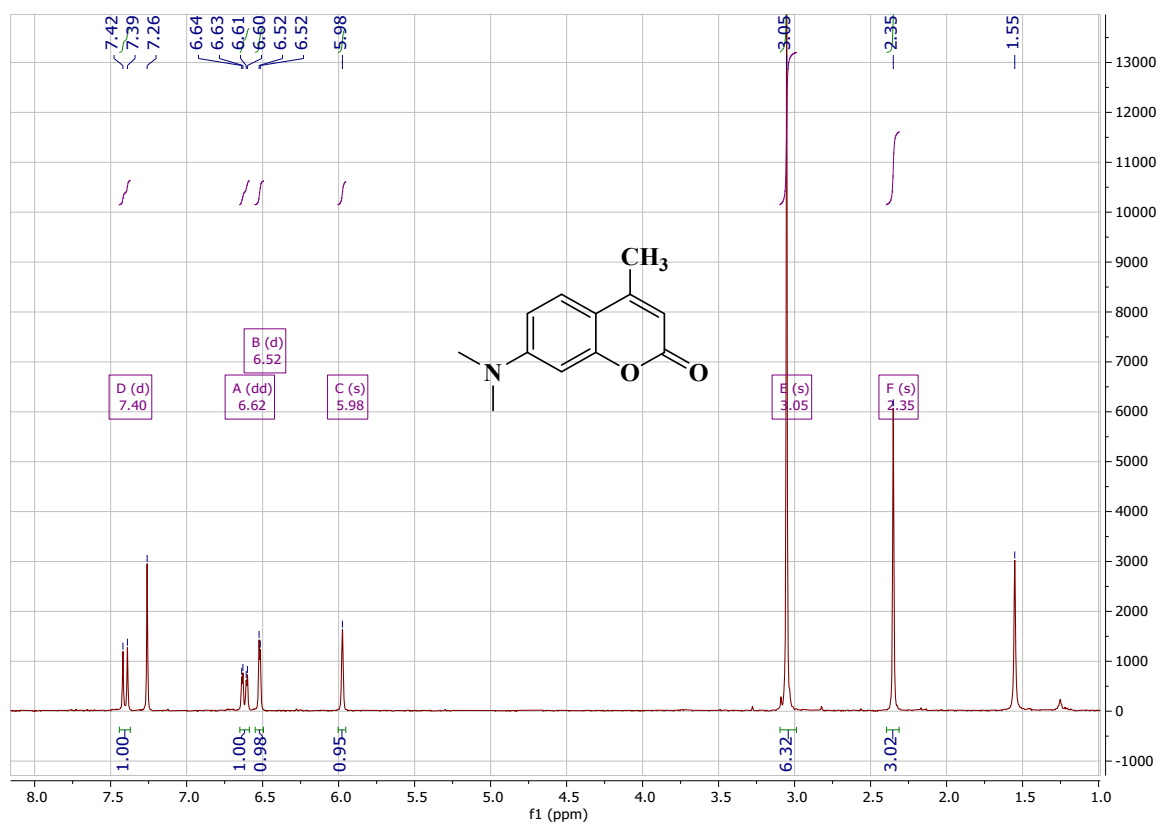

<sup>13</sup>C NMR spectrum of 7-(dimethylamino)-4-methyl-2H-chromen-2-one

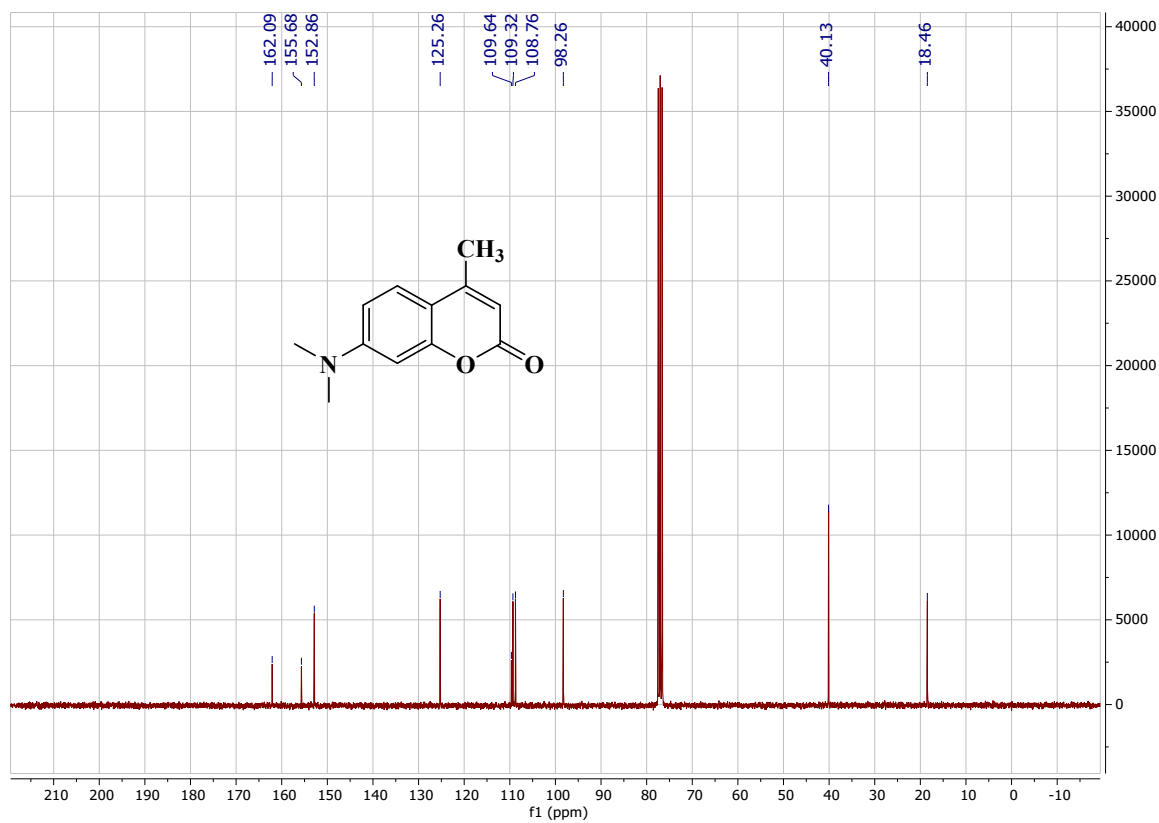

Synthesis of 7-(dimethylamino)-4-(2-(9-ethyl-9*H*-carbazol-3-yl)vinyl)-2*H*-chromen-2-one (Coum4)

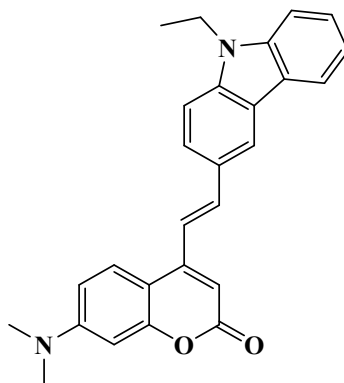

Chemical Formula:  $C_{27}H_{24}N_2O_2$

Molecular Weight: 408.5010

2-(7-(Dimethylamino)-2-oxo-2*H*-chromen-4-yl)acetic acid (1 g, 4.04 mmol,  $M = 247.50$  g/mol) and *N*-ethylcarbazole-3-carbaldehyde (0.90 g, 4.04 mmol,  $M = 223.27$  g/mol) were dissolved in ethanol (30 mL), and piperidine (0.5 mL) was added. The solution was stirred at reflux overnight. During that time, the reaction colour changed from colorless to yellow. The solution was cooled to room temperature. A yellow precipitate formed. It was filtered off, washed with ethanol and dried under vacuum (1.22 g, 74% yield).

$^1H$  NMR (400 MHz,  $CDCl_3$ )  $\delta$  8.30 (d,  $J = 1.4$  Hz, 1H), 8.16 (d,  $J = 7.7$  Hz, 1H), 7.75 – 7.69 (m, 2H), 7.56 – 7.49 (m, 2H), 7.44 (dd,  $J = 8.4, 2.6$  Hz, 2H), 7.35 (d,  $J = 15.9$  Hz, 1H), 7.31 – 7.27 (m, 1H), 6.67 (dd,  $J = 9.0, 2.6$  Hz, 1H), 6.58 (d,  $J = 2.5$  Hz, 1H), 6.36 (s, 1H), 4.40 (q,  $J = 7.2$  Hz, 2H), 3.08 (s, 6H), 1.47 (t,  $J = 7.2$  Hz, 3H).

$^{13}C$  NMR (75 MHz,  $CDCl_3$ )  $\delta$  162.77, 156.15, 152.80, 150.91, 140.67, 140.48, 138.02, 127.10, 126.22, 125.29, 125.18, 123.46, 122.88, 120.61, 120.14, 119.48, 117.76, 108.87, 108.85, 108.75, 108.55, 103.18, 98.63, 40.11, 37.76, 13.85.

<sup>1</sup>H NMR spectrum of 7-(dimethylamino)-4-(2-(9-ethyl-9H-carbazol-3-yl)vinyl)-2H-chromen-2-one

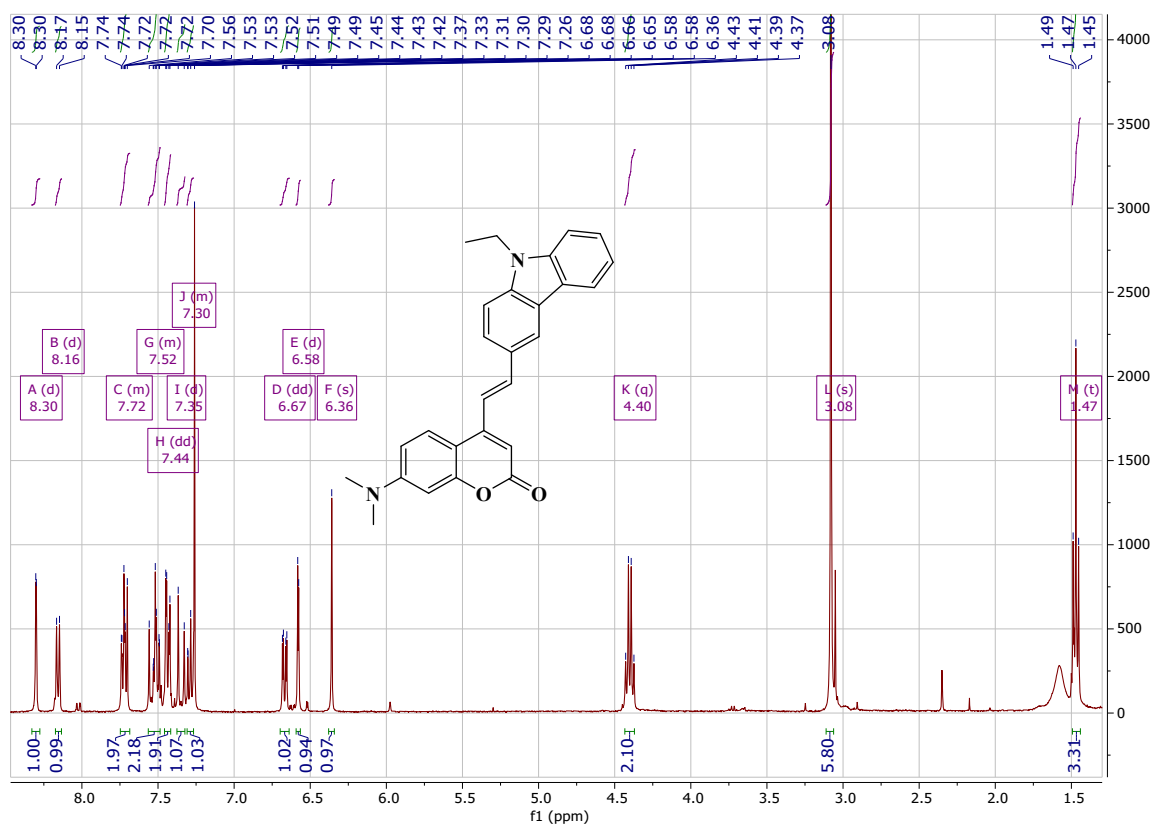

<sup>13</sup>C NMR spectrum of 7-(dimethylamino)-4-(2-(9-ethyl-9H-carbazol-3-yl)vinyl)-2H-chromen-2-one

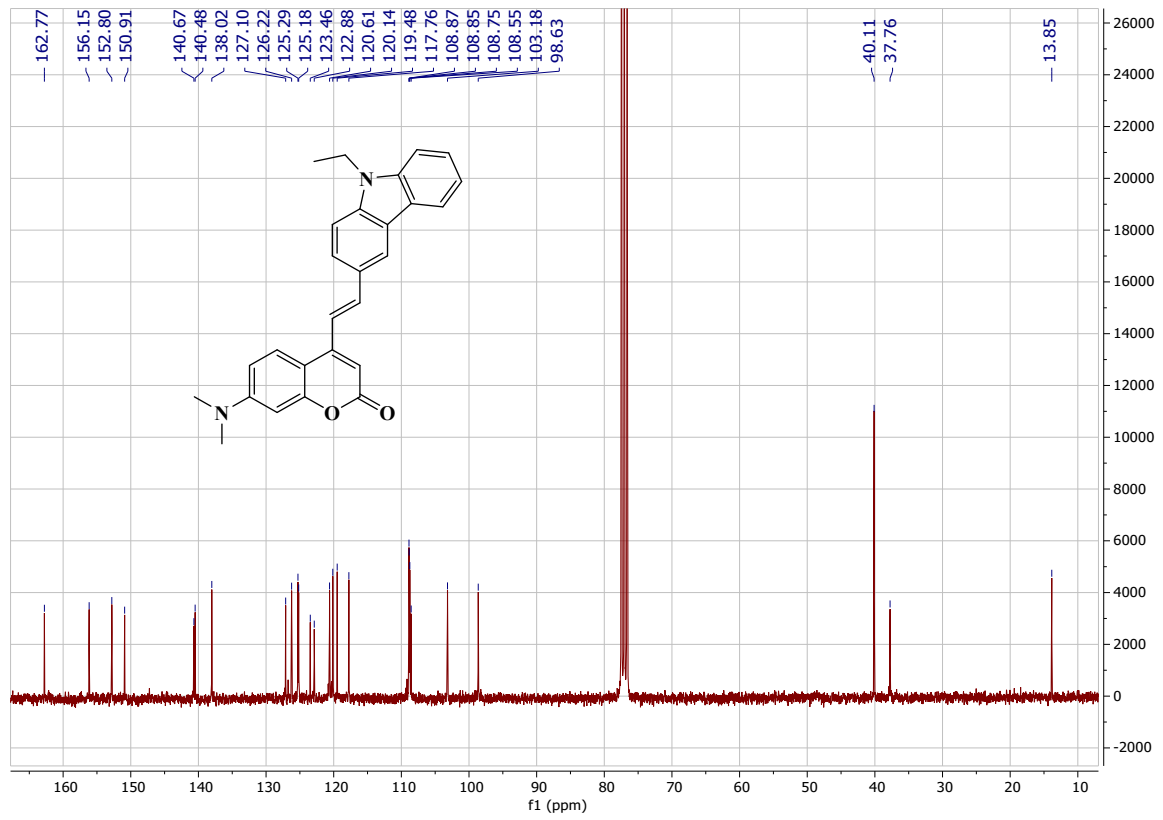

Synthesis of 4-(2-(6-acetyl-9-ethyl-9*H*-carbazol-3-yl)vinyl)-7-(dimethylamino)-2*H*-chromen-2-one (Coum5)

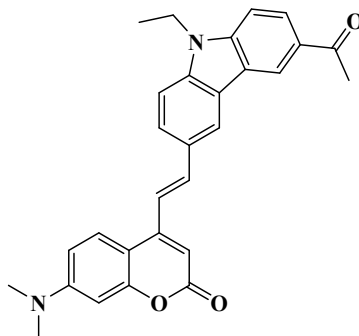

Chemical Formula: C<sub>29</sub>H<sub>26</sub>N<sub>2</sub>O<sub>3</sub>  
Molecular Weight: 450.5380

7-(Dimethylamino)-4-(2-(9-ethyl-9*H*-carbazol-3-yl)vinyl)-2*H*-chromen-2-one (1.39 g, 3.42 mmol, M = 408.50 g/mol) and acetyl chloride (0.532 g, 0.48 mL, 6.84 mmol, d = 1.104, M = 78.05 g/mol) were dissolved in 10 mL DCM (stabilized with amylene) and the solution was cooled to 0°C. Then, AlCl<sub>3</sub> (0.9 g, 6.84 mmol, M = 133.33 g/mol, 1 eq.) were added in one portion and the solution was stirred overnight. The reaction mixture was poured on ice-water. The solution was extracted several times with DCM. The organic phases were combined, dried over magnesium sulfate and the solvent removed under reduced pressure. The residue was filtered on a plug of silicagel using DCM as the eluent. The product was isolated in 84% yield.

<sup>1</sup>H NMR (400 MHz, CDCl<sub>3</sub>) δ 8.78 (d, *J* = 1.7 Hz, 1H), 8.35 (d, *J* = 1.7 Hz, 1H), 8.15 (dd, *J* = 8.6, 1.7 Hz, 1H), 7.70 (ddt, *J* = 10.3, 7.2, 1.6 Hz, 2H), 7.49 – 7.40 (m, 3H), 7.35 (d, *J* = 15.5 Hz, 1H), 6.68 – 6.63 (m, 1H), 6.54 (d, *J* = 2.5 Hz, 1H), 6.33 (d, *J* = 2.4 Hz, 1H), 4.38 (t, *J* = 7.1 Hz, 2H), 3.06 (d, *J* = 1.8 Hz, 6H), 2.74 (s, 3H), 1.47 (t, *J* = 7.3 Hz, 3H).

<sup>13</sup>C NMR (75 MHz, CDCl<sub>3</sub>) δ 197.48, 162.65, 156.18, 152.87, 150.63, 143.25, 141.35, 137.38, 129.38, 128.32, 126.96, 126.37, 125.16, 123.88, 122.70, 122.03, 119.85, 118.74, 109.44, 108.89, 108.81, 108.76, 108.48, 108.46, 103.46, 98.65, 40.11, 38.11, 26.68, 13.87



<sup>1</sup>H NMR spectrum of 4-(2-(6-acetyl-9-ethyl-9*H*-carbazol-3-yl)vinyl)-7-(dimethylamino)-2*H*-chromen-2-one

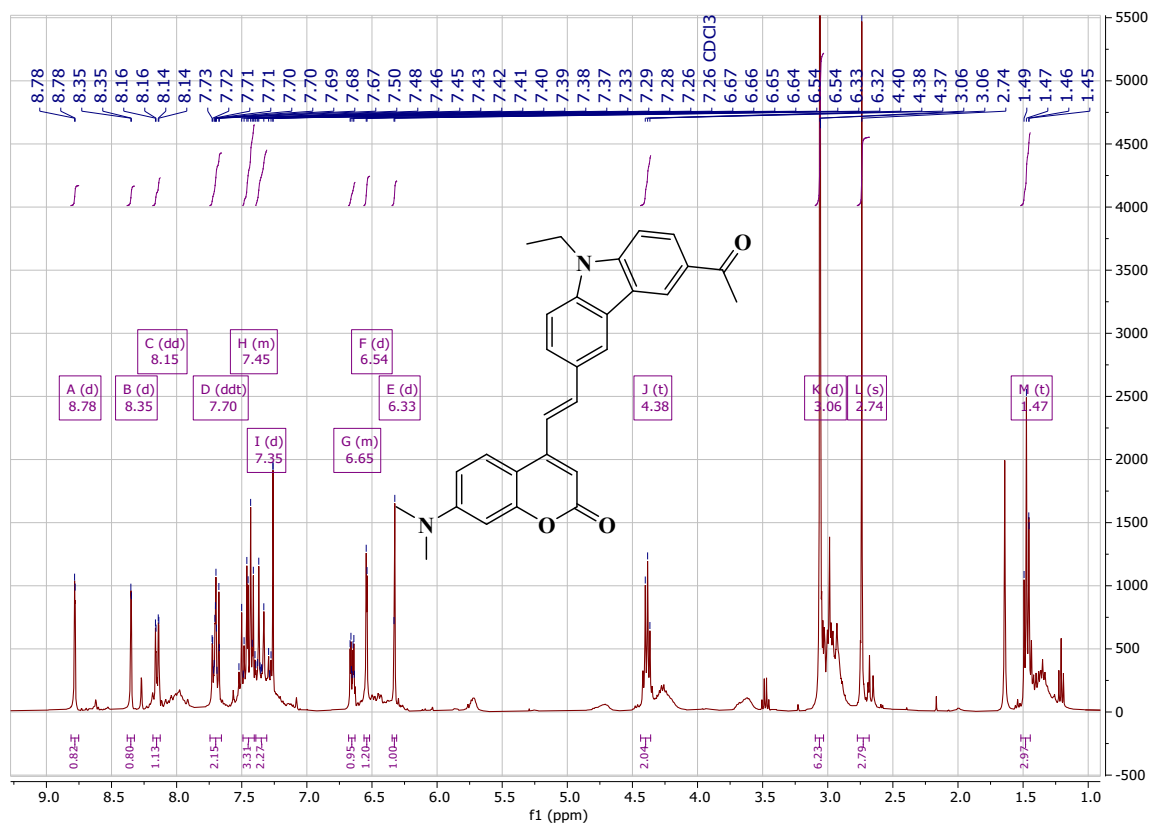

<sup>13</sup>C NMR spectrum of 4-(2-(6-acetyl-9-ethyl-9*H*-carbazol-3-yl)vinyl)-7-(dimethylamino)-2*H*-chromen-2-one

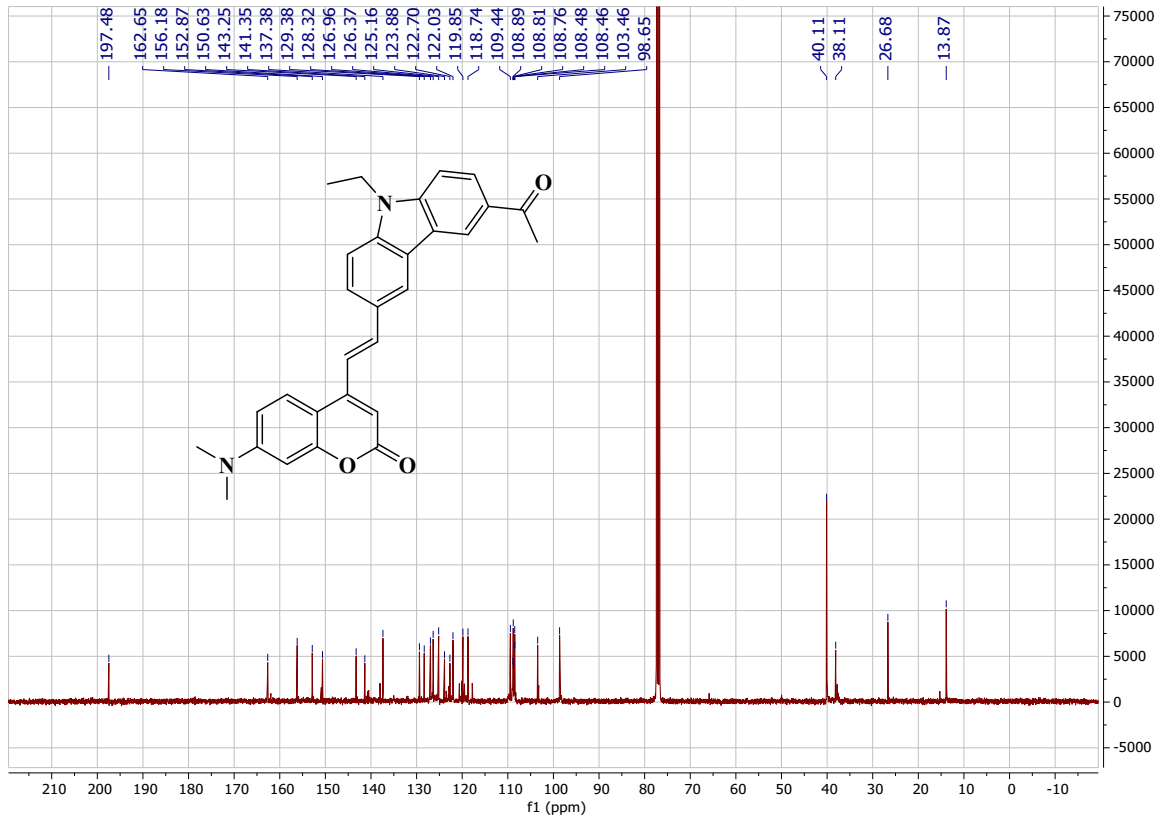

Supplement: d4py00485j1.pdf [file d4py00485j1.pdf]
